# Supplementary material for: Lunularin Producers versus Non-producers: Novel Human Metabotypes Associated with the Metabolism of Resveratrol by the Gut Microbiota
Source: PubMed Central journal article supplement (PMC9449969; doi:10.1021/acs.jafc.2c04518), 2022-08-18
Supplement: jf2c04518_si_001.pdf [file jf2c04518_si_001.pdf]

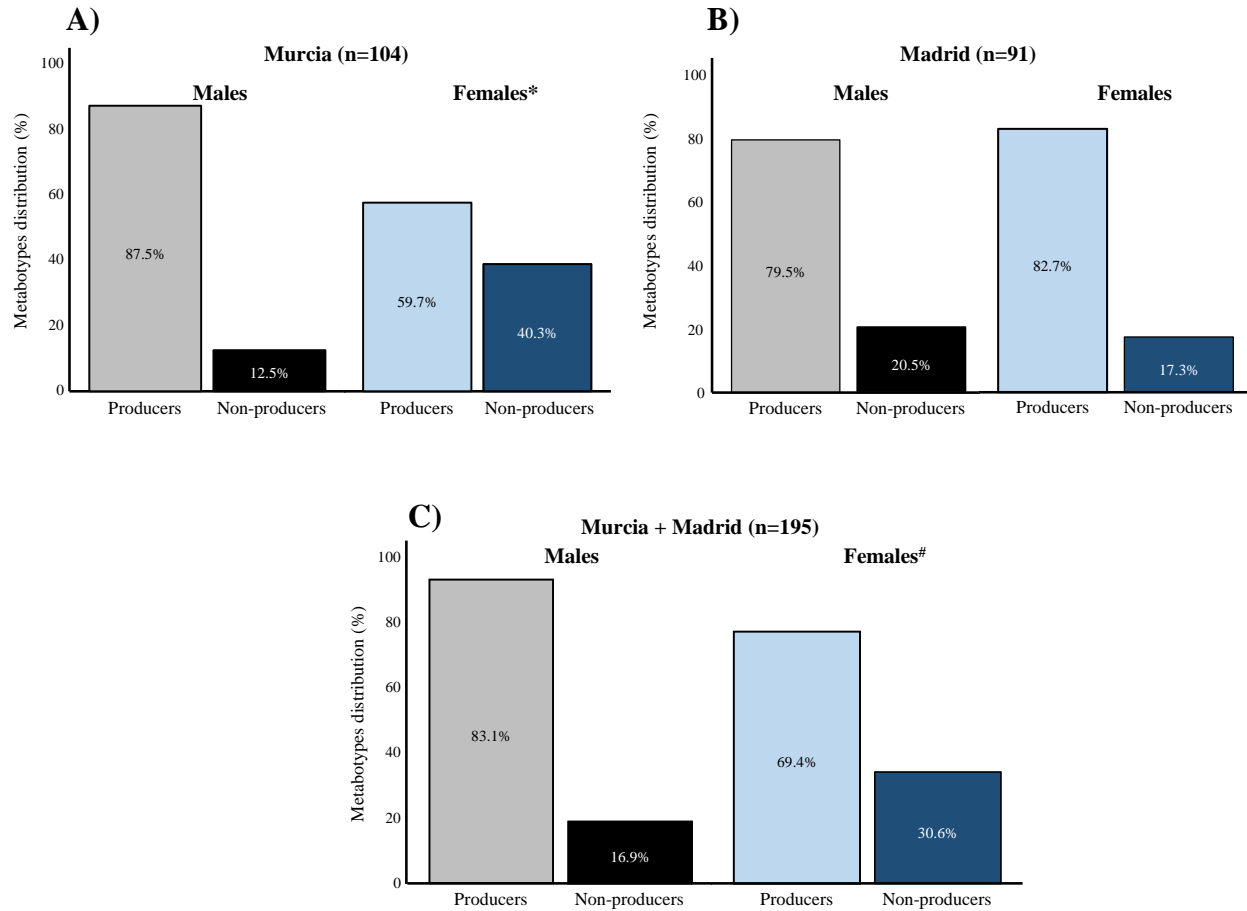

19  
20  
21  
22  
23  
24  
25  
26  
27  
28

**Figure 1S.** Distribution of LUNU metatypes according to the participants' sex. **(A)** Murcia, **(B)** Madrid, and **(C)** all the individuals. \* $P=0.01$  (females vs. males in Murcia) and # $P=0.037$  (females vs. males in Murcia+Madrid). Significant differences were determined using the Wald Chi-Square test (multinomial logistic regression model). The interaction between location and sex was also significant in the metatypes distribution ( $P=0.027$ ).
